# Supplementary material
Source: PubMed Central journal article supplement (PMC8156175)
Supplement: jama-e218565-s004.pdf [file jama-e218565-s004.pdf]

## Data Sharing Statement

### Data

**Data available:** Yes

**Data types:** Deidentified participant data

**How to access data:** data can be accessed by writing to the sponsor and principal investigator with reasonable request: Dr. Xiaoming Yang ([yangxiaoming@sinopharm.com](mailto:yangxiaoming@sinopharm.com))

**When available:** beginning date: 12-20-2022, end date: 12-31-2027

### Supporting Documents

**Document types:** None

### Additional Information

**Who can access the data:** Researchers whose proposed use of the data has been approved

**Types of analyses:** For analysis that has been approved by the principal investigator.

**Mechanisms of data availability:** With investigator support, approval of the proposal and signed data access agreement.
